# Supplementary material for: Neuroprotection by the histone deacetylase inhibitor trichostatin A in a model of lipopolysaccharide-sensitised neonatal hypoxic-ischaemic brain injury
Source: PubMed Central journal article supplement (PMC3420244; doi:10.1186/1742-2094-9-70), 2012-04-18
Supplement: 1742-2094-9-70-S8.pdf [file 1742-2094-9-70-S8.pdf]

**Additional File 12.**

**Supplementary Table 6. Oligodendrocyte differentiation/maturation factor expression 35 d after LPS sensitized HI in females**

|                                 |                      | <b>LPS/HI only</b> | <b>LPS + TSA/HI</b> |
|---------------------------------|----------------------|--------------------|---------------------|
| <i>ID2</i>                      | <i>Contralateral</i> | 68.00 ± 4.90       | 75.76 ± 8.39        |
|                                 | <i>Ipsilateral</i>   | 66.38 ± 6.42       | 53.22 ± 5.79        |
| <i>ID4</i>                      | <i>Contralateral</i> | 1046 ± 99.64       | 1071 ± 155.10       |
|                                 | <i>Ipsilateral</i>   | 1076 ± 157.00      | 931.0 ± 99.29       |
| <i>HES5</i>                     | <i>Contralateral</i> | 1.731 ± 0.179      | 1.996 ± 0.283       |
|                                 | <i>Ipsilateral</i>   | 1.244 ± 0.157      | 1.312 ± 0.194       |
| <i>Olig2</i>                    | <i>Contralateral</i> | 0.774 ± 0.135      | 0.688 ± 0.179       |
|                                 | <i>Ipsilateral</i>   | 0.677 ± 0.148      | 0.582 ± 0.189       |
| <i>PDGFR<math>\alpha</math></i> | <i>Contralateral</i> | 0.195 ± 0.021      | 0.290 ± 0.081       |
|                                 | <i>Ipsilateral</i>   | 0.157 ± 0.024      | 0.268 ± 0.090       |
| <i>MBP</i>                      | <i>Contralateral</i> | 942.5 ± 152.0      | 777.4 ± 141.4       |
|                                 | <i>Ipsilateral</i>   | 819.0 ± 205.3      | 487.9 ± 92.65       |

Gene expression expressed as data normalized to the arithmetic mean of GUSB and GAPDH. n=6-12
