# Supplementary material for: Neuroprotection by the histone deacetylase inhibitor trichostatin A in a model of lipopolysaccharide-sensitised neonatal hypoxic-ischaemic brain injury
Source: PubMed Central journal article supplement (PMC3420244; doi:10.1186/1742-2094-9-70), 2012-04-18

**A**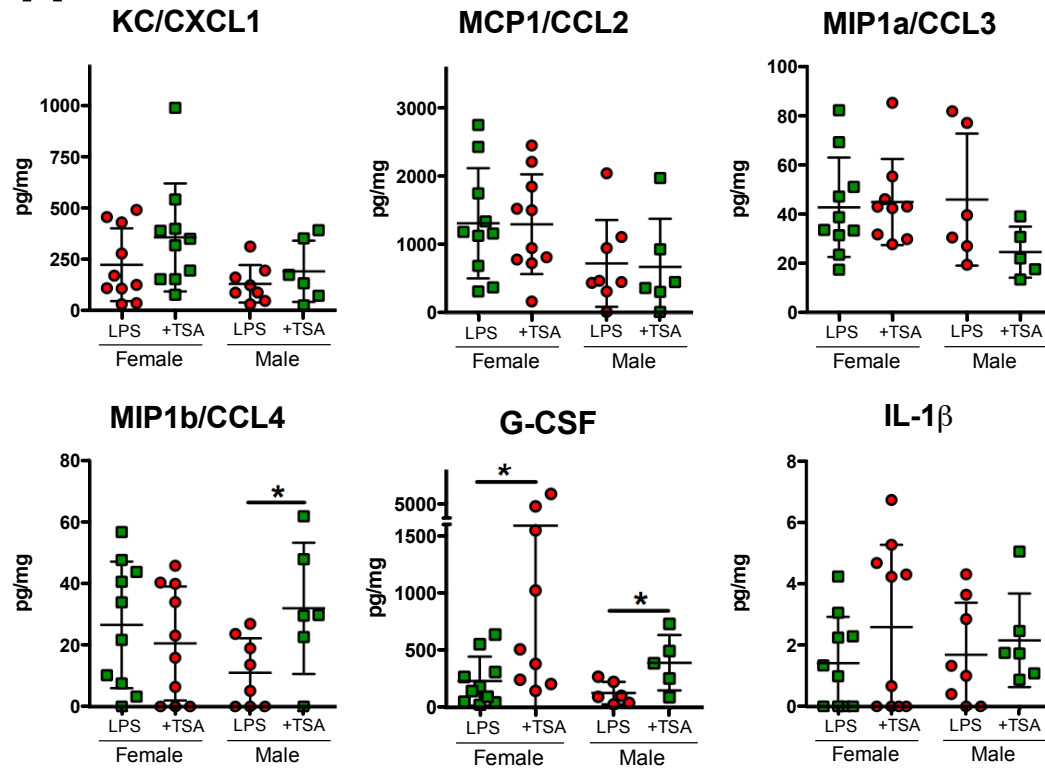**B**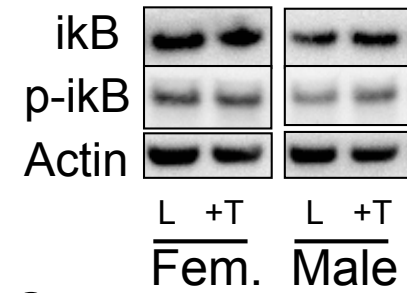**C**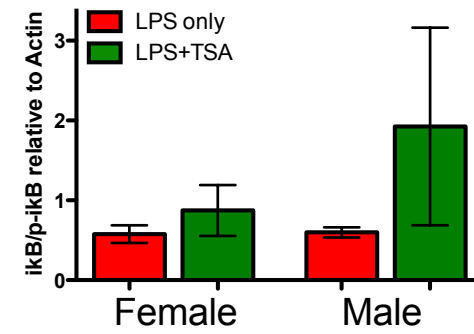

Supplement: 1742-2094-9-70-S9.pdf [file 1742-2094-9-70-S9.pdf]
