# Supplementary material for: Neuroprotection by the histone deacetylase inhibitor trichostatin A in a model of lipopolysaccharide-sensitised neonatal hypoxic-ischaemic brain injury
Source: J Neuroinflammation. 2012 Apr 18;9:70. doi: 10.1186/1742-2094-9-70 (PMC3420244; doi:10.1186/1742-2094-9-70)
Supplement: Additional file 3 — Table S2.Pup characteristics before and after treatment and/or HI. [file 1742-2094-9-70-S3.pdf]

**Additional File 8.**

**Supplementary Table 2: Pup characteristics before and after treatment and/or HI**

|                               | <b>LPS only</b> | <b>LPS + TSA treatment</b> |
|-------------------------------|-----------------|----------------------------|
| <b><i>Mortality</i></b>       |                 |                            |
| Male                          | 18% (3/16)      | 24% (3/14)                 |
| Female                        | 13% (2/15)      | 29% (5/17)                 |
| <b><i>P8 body weight</i></b>  |                 |                            |
| Male                          | 4.82 ± 0.16g    | 4.91 ± 0.11g               |
| Female                        | 4.60 ± 0.06g    | 5.00 ± 0.08g               |
| <b><i>P14 body weight</i></b> |                 |                            |
| Male                          | 6.09 ± 0.45g    | 5.78 ± 0.46g               |
| Female                        | 5.73 ± 0.31g    | 5.75 ± 0.37g               |
| <b><i>P35 body weight</i></b> |                 |                            |
| Female                        | 15.5 ± 0.2g     | 16.1 ± 0.3g (P=0.06)       |
