# Supplementary material for: Neuroprotection by the histone deacetylase inhibitor trichostatin A in a model of lipopolysaccharide-sensitised neonatal hypoxic-ischaemic brain injury
Source: J Neuroinflammation. 2012 Apr 18;9:70. doi: 10.1186/1742-2094-9-70 (PMC3420244; doi:10.1186/1742-2094-9-70)
Supplement: Additional file 5 — Table S3.Cell death in the ipsilateral hemisphere 24 h after LPS sensitized HI in females. [file 1742-2094-9-70-S5.pdf]

**Additional File 9.**

**Supplementary Table 3. Cell death in the ipsilateral hemisphere 24 h after LPS sensitized HI in females**

|                          |               | <b>LPS/HI</b> | <b>LPS+TSA/HI</b> |
|--------------------------|---------------|---------------|-------------------|
| Cortex                   | Caspase-3 +ve | 4.11 ± 2.10   | 2.92 ± 0.84       |
|                          | Pyknosis +ve  | 0.15 ± 0.06   | 0.12 ± 0.03       |
| Subcortical White Matter | Caspase-3 +ve | 0.75 ± 0.36   | 0.83 ± 0.25       |
|                          | Pyknosis +ve  | 0.15 ± 0.07   | 0.13 ± 0.05       |
| CA1                      | Caspase-3 +ve | 1.39 ± 0.27   | 3.03 ± 1.41       |
|                          | Pyknosis +ve  | na            | 0.05 ± 0.04       |
| Dentate Gyrus            | Caspase-3 +ve | 0.06 ± 0.05   | na                |
|                          | Pyknosis +ve  | 1.70 ± 0.33   | 3.25 ± 0.72       |
| Thalamus                 | Caspase-3 +ve | 0.57 ± 0.14   | 0.58 ± 0.14       |
|                          | Pyknosis +ve  | 2.80 ± 0.47   | 2.48 ± 0.82       |
| Caudate Putamen          | Caspase-3 +ve | 0.65 ± 0.05   | 0.50 ± 0.19       |
|                          | Pyknosis +ve  | 4.41 ± 2.45   | 5.91 ± 2.72       |

All values are cells per mm<sup>2</sup> and na=no cells counted of that type.
