# Supplementary material for: Neuroprotection by the histone deacetylase inhibitor trichostatin A in a model of lipopolysaccharide-sensitised neonatal hypoxic-ischaemic brain injury
Source: J Neuroinflammation. 2012 Apr 18;9:70. doi: 10.1186/1742-2094-9-70 (PMC3420244; doi:10.1186/1742-2094-9-70)
Supplement: Additional file 6 — Table S4.Oligodendrocyte differentiation/maturation factor expression 6 h after LPS+/− TSA. [file 1742-2094-9-70-S6.pdf]

**Additional File 10.**

**Supplementary Table 4. Oligodendrocyte differentiation/maturation factor expression 6 h after LPS+/- TSA**

|               |               | <b>LPS only</b> | <b>LPS + TSA</b> |   |
|---------------|---------------|-----------------|------------------|---|
| <i>ID2</i>    | <i>Female</i> | 4.579 ± 1.078   | 4.194 ± 0.601    | * |
|               | <i>Male</i>   | 2.872 ± 0.524   | 2.996 ± 0.398    |   |
| <i>ID4</i>    | <i>Female</i> | 35.46 ± 6.796   | 25.64 ± 4.314    | * |
|               | <i>Male</i>   | 22.96 ± 3.203   | 18.69 ± 3.452    |   |
| <i>HES5</i>   | <i>Female</i> | 0.153 ± 0.054   | 0.137 ± 0.034    | * |
|               | <i>Male</i>   | 0.082 ± 0.010   | 0.067 ± 0.006    |   |
| <i>Olig2</i>  | <i>Female</i> | 0.288 ± 0.082   | 0.277 ± 0.061    |   |
|               | <i>Male</i>   | 0.233 ± 0.057   | 0.190 ± 0.048    |   |
| <i>PDGFRα</i> | <i>Female</i> | 0.034 ± 0.007   | 0.033 ± 0.006    |   |
|               | <i>Male</i>   | 0.025 ± 0.005   | 0.022 ± 0.004    |   |
| <i>MBP</i>    | <i>Female</i> | 1.380 ± 0.258   | 1.336 ± 0.686    |   |
|               | <i>Male</i>   | 0.713 ± 0.192   | 1.152 ± 0.281    |   |

Gene expression expressed as the geometric mean of data normalized to GAPDH and HPRT1. LPS only female n=9, male n=9; LPS+TSA female n=9, male n=10. \*, P<0.05 comparing male and female at the same time point; 2-way ANOVA.
