# Supplementary material for: Neuroprotection by the histone deacetylase inhibitor trichostatin A in a model of lipopolysaccharide-sensitised neonatal hypoxic-ischaemic brain injury
Source: J Neuroinflammation. 2012 Apr 18;9:70. doi: 10.1186/1742-2094-9-70 (PMC3420244; doi:10.1186/1742-2094-9-70)
Supplement: Additional file 7 — Table S5.Oligodendrocyte differentiation/maturation factor expression 24 h after LPS sensitized HI in females. [file 1742-2094-9-70-S7.pdf]

**Additional File 11.**

**Supplementary Table 5. Oligodendrocyte differentiation/maturation factor expression 24 h after LPS sensitized HI in females**

|               |                      | <b>LPS/HI only</b> | <b>LPS + TSA/HI</b> |  |
|---------------|----------------------|--------------------|---------------------|--|
| <i>ID2</i>    | <i>Contralateral</i> | 0.084 ± 0.013      | 0.076 ± 0.013       |  |
|               | <i>Ipsilateral</i>   | 0.080 ± 0.013      | 0.887 ± 0.172       |  |
| <i>ID4</i>    | <i>Contralateral</i> | 0.735± 0.615       | 0.717 ± 0.120       |  |
|               | <i>Ipsilateral</i>   | 0.615 ± 0.104      | 0.734 ± 0.138       |  |
| <i>HES5</i>   | <i>Contralateral</i> | 0.006 ± 0.002      | 0.005 ± 0.002       |  |
|               | <i>Ipsilateral</i>   | 0.007 ± 0.002      | 0.005 ± 0.002       |  |
| <i>Olig2</i>  | <i>Contralateral</i> | 0.025 ± 0.002      | 0.023 ± 0.003       |  |
|               | <i>Ipsilateral</i>   | 0.026 ± 0.007      | 0.027 ± 0.007       |  |
| <i>PDGFRα</i> | <i>Contralateral</i> | 0.110 ± 0.030      | 0.007 ± 0.023       |  |
|               | <i>Ipsilateral</i>   | 0.072 ± 0.020      | 0.051 ± 0.016       |  |
| <i>MBP</i>    | <i>Contralateral</i> | 0.067 ± 0.011      | 0.059 ± 0.007       |  |
|               | <i>Ipsilateral</i>   | 0.063 ± 0.011      | 0.056 ± 0.006       |  |

Gene expression expressed as data normalized to GAPDH. LPS/HI female n=7; LPS+TSA/HI female n=9.
