# Supplementary material for: Neuroprotection by the histone deacetylase inhibitor trichostatin A in a model of lipopolysaccharide-sensitised neonatal hypoxic-ischaemic brain injury
Source: J Neuroinflammation. 2012 Apr 18;9:70. doi: 10.1186/1742-2094-9-70 (PMC3420244; doi:10.1186/1742-2094-9-70)
Supplement: Additional file — Table S1.List of antibodies used in the study. [file 1742-2094-9-70-S1.pdf]

Additional File 7.

**Supplementary Table 1: List of antibodies used in the study**

| Name                                                                    | Product code | Application                                        | Dilution | Source             |
|-------------------------------------------------------------------------|--------------|----------------------------------------------------|----------|--------------------|
| MBP; Mouse monoclonal anti-SMI94                                        | SMI-94R      | Immunohistochemistry, 5 um paraffin sections       | 1:10,000 | Covance, Inc.      |
|                                                                         |              | Western Blotting                                   | 1µg/ml   |                    |
| MAP-2; Mouse monoclonal anti- microtubule-associated protein-2          | M4403        | Immunohistochemistry, 5 um paraffin sections       | 1:2000   | Sigma-Aldrich      |
| Iba1; Rabbit monoclonal anti-ionized calcium binding adaptor molecule 1 | 019-19741    | Immunohistochemistry, 5 um paraffin sections       | 1:2000   | Wako Chemicals USA |
| Olig2; Rabbit polyclonal anti-Olig2                                     | AB9610       | Immunohistochemistry, 5 um paraffin sections       | 1:2000   | Millipore          |
| Caspase-3; Rabbit monoclonal anti-active caspase-3                      | 559565       | Immunohistochemistry, 25 um free floating sections | 1:1000   | BD Biosciences     |
| Acetyl H4; Rabbit monoclonal anti-acetylated Histone-4                  | 06-698       | Western Blotting                                   | 1µg/ml   | Millipore          |
| Acetyl H3; Rabbit monoclonal anti-acetylated Histone-3                  | 06-588       | Western Blotting                                   | 1µg/ml   | Millipore          |
| Histone 2B; Rabbit monoclonal anti-Histone 2B                           | 07-371       | Western Blotting                                   | 1µg/ml   | Millipore          |
| HSC-70; Mouse monoclonal anti-heat shock cognate 70                     | Ab90349      | Western Blotting                                   | 1µg/ml   | Abcam              |
| Nrf2; Mouse monoclonal Anti-Nrf2                                        | MAB3925      | Western Blotting                                   | 5µg/ml   | R&D Systems        |
| Actin; Rabbit polyclonal anti-actin                                     | A 2066       | Western Blotting                                   | 0.1ug/ml | Sigma-Aldrich      |
